# Supplementary material
Source: publisher site journal article supplement (https://www.dovepress.com/article/581629)
Supplement: Supplementary file 1 [file Supplementary%20Material.pdf]

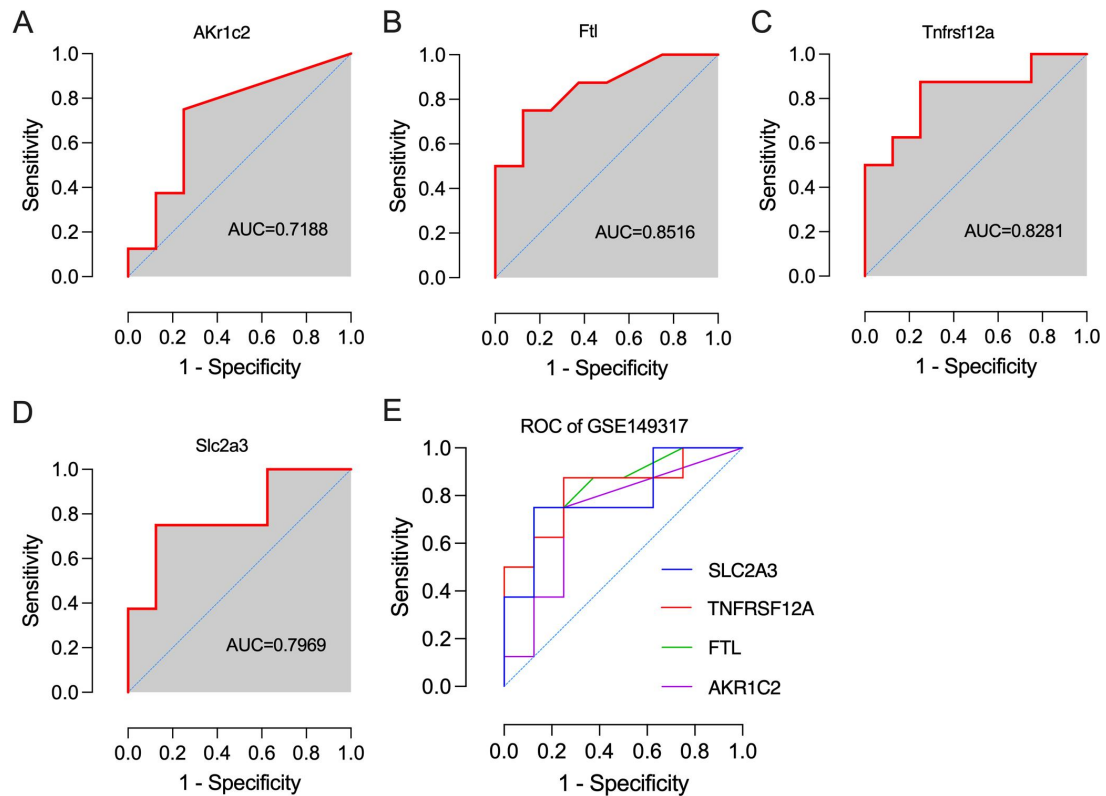

**Supplementary Figure 1. The diagnostic performance of panptosis signature genes was exploratory validation in an independent rat transcriptome dataset (GSE149317). As SLC2A14 lacks a direct ortholog in the rat genome, analysis was conducted for the four conserved homologs. (A-D) Receiver operating characteristic (ROC) curves for AkR1c2 (AUC = 0.719), Ftl (AUC = 0.852), Slc2a3 (AUC = 0.828), and Tnfrsf12a (AUC = 0.797). (E) ROC curve of the four signature genes. AUC, area under the curve.**

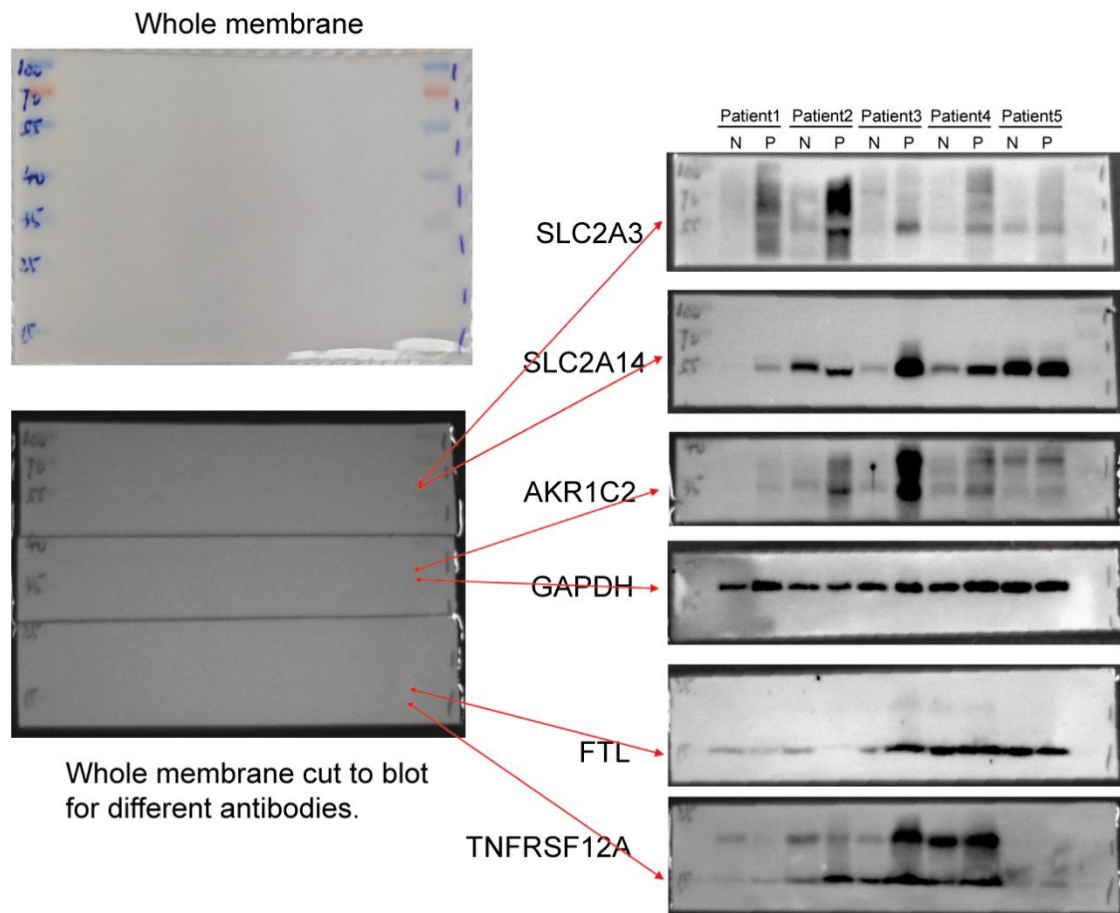

**Supplementary Figure 2. Original western blot bands.** Proteins with similar molecular weights were detected sequentially on the same membrane: SLC2A14 and SLC2A3, AKR1C2 and GAPDH, TWEAKR and FTL. For each pair, the membrane was first incubated with the primary antibody against the former protein, visualized, then stripped. The following day, it was re-probed with the primary antibody against the latter protein.

**Supplementary Table 1. A total of 524 PANRGs, 577 FRGs and 62 CRGs comprised the 1163 PRGs set.**

| <b>PANoptosis-related genes (PRGs) set</b> |         |               |         |                 |        |         |            |                |
|--------------------------------------------|---------|---------------|---------|-----------------|--------|---------|------------|----------------|
| <b>524 PANRGs</b>                          |         |               |         | <b>577 FRGs</b> |        |         |            | <b>62 CRGs</b> |
| H1-2                                       | PPT1    | CAMK2A        | GNA15   | DCAF7           | MIR214 | MIR539  | FNDC5      | NDUFA1         |
| BAK1                                       | F2      | CAMK2D        | MGMT    | RPL8            | DLD    | KMT2D   | CircIL4R   | FDX1           |
| TP63                                       | IL6     | CAMK2B        | DBNL    | IREB2           | WWTR1  | GPX4    | CDH1       | SLC31A1        |
| CHMP2 B                                    | SC5D    | CAMK2G        | NMT1    | ATP5MC3         | PRKCA  | AKR1C1  | NEDD4L     | DLAT           |
| BAX                                        | IFITM3  | SLC25A4       | TLR4    | CS              | LGMN   | AKR1C2  | BRD2       | CD274          |
| GZMB                                       | RNASEL  | SLC25A5       | PSMB7   | EMC2            | SMPD1  | AKR1C3  | BRD3       | ARFGEF1-DT     |
| CHMP4 B                                    | EMP1    | SLC25A6       | UACA    | ACSF2           | MYCN   | RB1     | BRDT       | SMAD3-AS1      |
| GSDMD                                      | CAV1    | SLC25A31      | PSMB6   | NOX1            | IFNA1  | HSPB1   | DECR1      | LINC03085      |
| GSDME                                      | DNM1L   | PPID          | PSMA5   | CYBB            | IFNA2  | HSF1    | GLRX5      | LIPT1          |
| IL1A                                       | ANXA1   | VDAC1         | TP53BP2 | NOX3            | IFNA4  | GCLC    | NCOA3      | C6orf136       |
| CHMP3                                      | TOP2A   | VDAC3         | RPS27A  | NOX4            | IFNA5  | NFE2L2  | NR5A2      | CDKN2A         |
| IRF1                                       | ISG20   | GLUD2         | CDKN2A  | NOX5            | IFNA6  | SQSTM1  | PANX2      | H2BC6-AS1      |
| IL1B                                       | SLC20A1 | GLUD1         | GAS2    | DUOX1           | IFNA7  | NQO1    | RHEBP1     | ATP7A          |
| CHMP2 A                                    | MADD    | GLUL          | APIP    | DUOX2           | IFNA8  | FTH1    | TFAP2A     | H1-10-AS1      |
| CASP1                                      | PPP2R5B | PYGL          | UBC     | G6PD            | IFNA10 | MUC1    | CP         | SERPINE1       |
| CASP5                                      | BCAP31  | PYGM          | LY96    | PGD             | IFNA13 | SLC3A2  | ARF6       | PDHB           |
| TP53                                       | ERBB3   | PYGB          | PSMA8   | VDAC2           | IFNA14 | MT1G    | GDF15      | SLC27A5        |
| CHMP7                                      | NEDD9   | MAPK10        | APPL1   | PIK3CA          | IFNA16 | SLC40A1 | ABHD12     | FOXD2-AS1      |
| IL18                                       | SAT1    | MAPK9         | PSMD4   | FLT3            | IFNA17 | CISD1   | PPP1R13L   | LINC02154      |
| CASP3                                      | PDCD4   | FTH1          | PSMB4   | SCP2            | IFNA21 | FANCD2  | TFAM       | LINC00853      |
| CHMP4 C                                    | BCL2L2  | FTL           | PSMC2   | TP53            | SMG9   | FTMT    | KDM3B      | LASTR          |
| IRF2                                       | FEZ1    | PLA2G4E       | OMA1    | ACSL4           | PPARG  | HSPA5   | RNF113A    | HSPD1          |
| CYCS                                       | ERBB2   | PLA2G4A       | PSMD6   | LPCAT3          | MIR335 | HELLS   | AHCY       | PDHX           |
| CHMP6                                      | DNAJA1  | JMJD7-PLA2G4B | PRKCD   | NRAS            | SNX5   | SCD     | circ-TTBK2 | SNHG16         |
| HMGB1                                      | DAP3    | PLA2G4B       | YWHAZ   | KRAS            | PAQR3  | SRC     | MIR522     | DLD            |
| CASP4                                      | DPYD    | PLA2G4C       | PSMC3   | HRAS            | MICU1  | STAT3   | IDH2       | ARID1A         |
| ELANE                                      | NEFH    | PLA2G4D       | YWHAB   | TF              | TOR2A  | PML     | PPARA      | SQSTM1         |
| CHMP4 A                                    | PAK1    | PLA2G4F       | PSMD2   | TFRC            | MIR375 | MTOR    | NOS2       | HMGB1          |

|         |          |              |        |           |            |           |          |          |
|---------|----------|--------------|--------|-----------|------------|-----------|----------|----------|
| CASP9   | FDXR     | ALOX15       | SFN    | TFR2      | MAP3K14    | NFS1      | SIAH2    | NLRP3    |
| DFFA    | GPX4     | SMPD1        | DAPK1  | SLC38A1   | CircKDM4C  | TP63      | RELA     | GPX4     |
| CASP7   | ETF1     | MLKL         | YWHAE  | SLC1A5    | MIR324     | CDKN1A    | VDR      | NLRP2    |
| CFLAR   | CCNA1    | PGAM5        | PSMD9  | GLS2      | QSOX1      | MIR137    | NEDD4    | SLC25A3  |
| BIRC3   | GUCY2D   | NLRP3        | LMNB1  | GOT1      | MIB2       | ENPP2     | PRDX1    | NLRP7    |
| PMAIP1  | AVPR1A   | PYCARD       | UNC5A  | CARS1     | CLTRN      | FH        | AR       | CALCOCO2 |
| CASP8   | CASP10   | RNF103-CHMP3 | KPNA1  | ALOX5     | KLF2       | CISD2     | MTF1     | TAX1BP1  |
| JUN     | CHUK     | VPS4B        | TFDP2  | KEAP1     | MIR5096    | MIR9-1    | COPZ1    | ATP7B    |
| BCL2L11 | PRKAR2B  | VPS4A        | PSMD14 | HMOX1     | HOTAIR     | MIR9-2    | NUPR1    | DPYD     |
| MCL1    | PPP3R2   | CHMP1B       | TJP2   | ATG5      | H19        | MIR9-3    | USP35    | DBT      |
| SPTAN1  | PPP3CC   | CHMP1A       | H1-3   | ATG7      | FOXO4      | CBS       | NEAT1    | DLST     |
| DIABLO  | MYD88    | CHMP5        | H1-1   | NCOA4     | YTHDC2     | ISCU      | PARP1    | GCSH     |
| BIK     | FADD     | TRPM7        | PSMF1  | ALOX12    | DDR2       | ACSL3     | PARP2    | GLRX5    |
| BID     | RIPK1    | IL33         | PSMB2  | ALOX12B   | SLC39A7    | OTUB1     | PARP3    | GLS      |
| CDKN1A  | BAD      | FAF1         | TICAM1 | ALOX15    | TRIM46     | CD44      | PARP4    | LIPA     |
| GADD45A | IRAK4    | IFNA1        | SEM1   | ALOX15B   | ACSL1      | LINC00336 | PARP6    | LIPT2    |
| DDIT3   | IKKBK    | IFNA2        | YWHAH  | ALOXE3    | KDM5A      | BRD4      | PARP8    | MTF1     |
| CDKN1B  | AKT1     | IFNA4        | PSMA1  | PHKG2     | TRIM21     | PRDX6     | PARP9    | NDUFB10  |
| TNF     | AKT2     | IFNA5        | PSME3  | ACO1      | DPEP1      | MIR17     | PARP10   | NDUFB2   |
| GSN     | TNFRSF1A | IFNA6        | YWHAQ  | G6PDX     | CYGB       | SESN2     | PARP11   | NDUFB6   |
| TNFSF10 | AKT3     | IFNA7        | STK26  | ULK1      | IDO1       | NF2       | PARP12   | NDUFC1   |
| CASP6   | CHP2     | IFNA8        | DSG3   | ATG3      | GSTZ1      | ARNTL     | PARP14   | NDUFC2   |
| SQSTM1  | ATM      | IFNA10       | DSG1   | ATG4D     | GJA1       | JUN       | PARP15   | NDUFV2   |
| FASLG   | ENDOGL   | IFNA13       | APC    | BECN1     | SLC7A11    | CA9       | PARP16   | PLAT     |
| EGR3    | NFKB1    | IFNA14       | DAPK3  | MAP1LC3A  | PGRMC1     | TMBIM4    | PDSS2    | PPAT     |
| CD44    | NFKBIA   | IFNA16       | H1-4   | GABARAPL2 | CIRBP      | PLIN2     | TXN      | SDHB     |
| FAS     | CAPN2    | IFNA17       | FNTA   | GABARAPL1 | circPSE N1 | MIR212    | SENP1    | ACO2     |
| IGFBP6  | PIK3R5   | IFNA21       | STAT3  | ATG16L1   | USP11      | Fer1HCH   | OIP5-AS1 | LIPM     |
| PRF1    | IKBKG    | IFNG         | AVEN   | WIPI1     | YAP1       | AIFM2     | MIR190A  | POLD1    |
| DAP     | CAPN1    | IFNAR1       | YWHAG  | WIPI2     | MIR135B    | LAMP2     | FGF21    | LAIS     |
| CCND1   | IL3RA    | IFNAR2       | UBB    | SNX4      | TRIM26     | ZFP36     | CREB1    | TIMMDC1  |
| BTG3    | IL3      | IFNGR2       | PSMD1  | ATG13     | NDRG1      | PROM2     | CREB3    | PDHA1    |

|           |           |           |          |           |                       |          |              |        |
|-----------|-----------|-----------|----------|-----------|-----------------------|----------|--------------|--------|
| F2R       | ENDOD1    | JAK1      | VTRNA1-1 | ULK2      | MIR302A               | CHMP5    | CREB5        | ISCA2  |
| SATB1     | APAF1     | JAK2      | NINJ1    | SAT1      | ASMTL-AS1             | CHMP6    | MIR130B      | NDUFA8 |
| BNIP3L    | PRKX      | JAK3      | PSMD12   | EGFR      | FADS2                 | CAV1     | BEX1         |        |
| TNFRSF12A | CSF2RB    | TYK2      | OCLN     | MAPK3     | PIEZO1                | GCH1     | ASAH2        |        |
| CREBBP    | TNFRSF10A | STAT1     | TFDP1    | MAPK1     | LIFR                  | DAZAP1   | FABP4        |        |
| RHOB      | TRAF2     | STAT2     | OPA1     | BID       | PTPN6                 | PIR      | AKT1S1       |        |
| GPX3      | TNFRSF10D | STAT4     | PSMB8    | ZEB1      | MIR15A                | FTL      | MLST8        |        |
| PDGFRB    | NGF       | STAT5A    | PSMB10   | DPP4      | EGR1                  | HCAR1    | TYRO3        |        |
| TSPO      | TNFRSF10B | STAT5B    | UBA52    | CDKN2A    | ADAM23                | SLC16A1  | SIRT6        |        |
| CCND2     | TNFRSF10C | STAT6     | PSMB11   | PEBP1     | ARHGEF26-AS1          | RRM2     | TMSB4X       |        |
| XIAP      | MAP3K14   | IRF9      | PSMB9    | SOCS1     | CPEB1                 | NR4A1    | TMSB4Y       |        |
| TIMP1     | IL1RAP    | EIF2AK2   | TICAM2   | CDO1      | COX4I2                | RPTOR    | KIF20A       |        |
| CTNNB1    | IRAK2     | TLR3      | DYNLL2   | MYB       | lncRNA AABR07017145.1 | SREBF1   | ECH1         |        |
| HSPB1     | IL1R1     | ZBP1      | PSMB3    | MAPK8     | TIMP1                 | SREBF2   | circRHOT1    |        |
| ADD1      | IRAK1     | USP21     | TRAF5    | MAPK9     | KDM6B                 | FZD7     | ETV4         |        |
| TIMP2     | TRADD     | HSP90AA1  | RBCK1    | CHAC1     | METTL14               | P4HB     | MEG8         |        |
| BTG2      | PIK3R3    | HSP90AB1  | RNF31    | MAPK14    | MIB1                  | NT5DC2   | VCP          |        |
| TIMP3     | BCL2      | TNFAIP3   | SHARPN   | LINC00472 | KDM5C                 | BCAT2    | circ_0007142 |        |
| LEF1      | BIRC2     | PARP2     | SPATA2L  | PRKAA2    | MEG3                  | PLA2G6   | RBMS1        |        |
| GPX1      | IRAK3     | PARP3     | SPATA2   | PRKAA1    | CCDC6                 | MIR424   | KDM4A        |        |
| BCL10     | PRKACA    | PARP4     | RIPK3    | ELAVL1    | CFL1                  | PARK7    | MGST1        |        |
| IGF2R     | PRKACB    | H2AX      | CYBB     | BAP1      | DRD4                  | FXN      | circKIF4A    |        |
| CDC25B    | PRKACG    | H2AC20    | PLEC     | ABCC1     | MAP3K5                | SUV39H1  | miR-7-5p     |        |
| AIFM3     | PPP3CB    | H2AC12    | MAGED1   | MIR6852   | SLC2A1                | ATF2     | circ_0067934 |        |
| CD38      | PPP3CA    | H2AC1     | PAK2     | ACVR1B    | SLC2A3                | ACOT1    | MPC1         |        |
| PPP3R1    | PIK3CA    | H2AW      | H1-5     | TGFBR1    | SLC2A6                | ALDH3A2  | CHMP1A       |        |
| HGF       | PIK3CB    | H2AB3     | PSMD13   | EPAS1     | SLC2A8                | STK11    | CAMKK2       |        |
| CLU       | DFFB      | H2AC8     | MAPT     | HILPDA    | SLC2A12               | CEBPG    | SOX2         |        |
| ATF3      | PIK3CD    | H2AC4     | DCC      | HIF1A     | GLUT13                | SNORA16A | SRSF9        |        |
| LGALS3    | PRKAR1A   | MACROH2A2 |          | IFNG      | SLC2A14               | RGS4     | PROK2        |        |

|         |          |           |  |          |           |                |                     |  |
|---------|----------|-----------|--|----------|-----------|----------------|---------------------|--|
| LUM     | PRKAR2A  | MACROH2A1 |  | ANO6     | EIF2AK4   | BLOC1S5-TXNDC5 | MIR4443             |  |
| LMNA    | PRKAR1B  | H2AC19    |  | LPIN1    | TFAP2C    | LOC390705      | SIRT2               |  |
| GADD45B | EXOGEN   | H2AJ      |  | HMGB1    | SP1       | EIF2S1         | circRNA1615         |  |
| CDK2    | PIK3CG   | H2AB1     |  | TNFAIP3  | HBA1      | KIM-1          | MIR27A              |  |
| IFNB1   | AIFM1    | H2AC17    |  | TLR4     | NNMT      | CXCL2          | MIR670              |  |
| RETSAT  | NTRK1    | H2AC18    |  | ATF3     | PLIN4     | HSD17B11       | MEF2C               |  |
| SMAD7   | PIK3R1   | H2AC11    |  | ATM      | HIC1      | SETD1B         | EZH2                |  |
| SOD1    | PIK3R2   | H2AC21    |  | YY1AP1   | STMN1     | MAFG           | PEDS1               |  |
| PTK2    | CHP1     | H2AZ2     |  | EGLN2    | CAPG      | IL33           | ADAMTS13            |  |
| ENO2    | PSMB1    | H2AC7     |  | MIOX     | HNF4A     | HAMP           | CDC25A              |  |
| HMOX1   | PSMC4    | H2AZ1     |  | TAFAZZIN | NGB       | STEAP3         | CircFNDC3B          |  |
| IER3    | VIM      | H2AC15    |  | MTDH     | YWHAE     | DRD5           | PPARD               |  |
| BCL2L10 | DAPK2    | H2AC6     |  | IDH1     | GABPB1    | SIRT3          | ENO3                |  |
| CD2     | CDH1     | H2AC13    |  | SIRT1    | AURKA     | CGAS           | LCN2                |  |
| GCH1    | PSMA4    | H2AC14    |  | FBXW7    | MIR4715   | STING1         | MARCHF5             |  |
| MMP2    | DSG2     | H2AC16    |  | PANX1    | RIPK1     | HDDC3          | TRIB2               |  |
| VDAC2   | PRKCQ    | H2AB2     |  | DNAJB6   | MIR30B    | MIR761         | DHODH               |  |
| TAP1    | PSME4    | PPIA      |  | BACH1    | MMP13     | MDM2           | MIR545              |  |
| PLAT    | ARHGAP10 | MTOR      |  | LONP1    | LRRFIP1   | MDM4           | PDK4                |  |
| IFNGR1  | TP73     | ITGA5     |  | CD82     | CBR1      | OXSRI          | CircPVT1            |  |
| APP     | PKP1     | CRYBA1    |  | IL1B     | PTGS2     | SELENO5        | MIR9-3HG            |  |
| BRCA1   | PSMC5    | STK11     |  | CTSB     | IREB      | ANGPTL7        | ADIPOQ              |  |
| ROCK1   | PPP1R13B | MAP3K7    |  | POR      | ATP5G3    | DDIT4          | circDTL             |  |
| PSEN1   | DYNLL1   | CEACAM6   |  | CYB5R1   | LncRNAH19 | LOC284561      | mmu_circRNA_0000309 |  |
| DCN     | PSME1    | ITGB1     |  | ELOVL5   | LOXs      | ASNS           | PTPN18              |  |
| PSEN2   | CLSPN    | TLE1      |  | FADS1    | GCL       | TSC22D3        | ABCC5               |  |
| SOD2    | PSMD5    | NTRK2     |  | PTEN     | GS        | DDIT3          | CISD3               |  |
| BMF     | DSP      | PTRH2     |  | NR1D1    | METTL3    | JDP2           | MS4A15              |  |
| EREG    | PSMD8    | BRMS1     |  | NR1D2    | HMGCR     | SLC1A4         | FURIN               |  |
| KRT18   | MAPK1    | ANKRD13C  |  | TBK1     | FSP1      | PCK2           | circRHBG            |  |
| TGFB2   | PSMC6    | CEACAM5   |  | IL6      | FPN       | TXNIP          | GALNT14             |  |

|        |         |          |  |             |               |          |             |  |
|--------|---------|----------|--|-------------|---------------|----------|-------------|--|
| RELA   | PSMA3   | TSC2     |  | USP7        | IRP2          | VLDLR    | KLHDC3      |  |
| WEE1   | PSMC1   | SNAI2    |  | miR-182-5p  | Nrf2          | GPT2     | LINC01833   |  |
| RARA   | PSMB5   | NOTCH1   |  | miR-378a-3p | PPAR $\gamma$ | PSAT1    | circGFRA1   |  |
| CD14   | ACIN1   | SIK1     |  | ATF4        | MT3           | LURAP1L  | MAPKAP1     |  |
| CD69   | PSMA6   | CHEK2    |  | AQP3        | UBC           | SLC7A5   | PRR5        |  |
| PEA15  | PSME2   | PDK4     |  | AQP5        | ALB           | HERPUD1  | RICTOR      |  |
| DNAJC3 | PSMA7   | MYBBP1A  |  | AQP8        | TXNRD1        | XBP1     | GSTM1       |  |
| CASP2  | E2F1    | TLE5     |  | LINC00618   | SRXN1         | ZNF419   | TERT        |  |
| CTH    | PSMD10  | SRC      |  | MT1DP       | GPX2          | KLHL24   | circ0097009 |  |
| PLCB2  | BMX     | ZNF304   |  | PEX10       | BNIP3         | TRIB3    | TMEM161B-DT |  |
| BMP2   | STK24   | MEFV     |  | AGPAT3      | ciARS         | ZFP69B   | circEPSTI1  |  |
| HMGB2  | MAPK3   | AIM2     |  | PEX12       | SLC39A14      | ATP6V1G2 | MIR18A      |  |
| PLPPR4 | PSMD7   | SOD2-OT1 |  | CHP1        | MAP3K11       | VEGFA    | RARRES2     |  |
| H1-0   | TJP1    | TUG1     |  | GPAT4       | GSK3B         | TUBE1    | DUSP1       |  |
| TGFBR3 | BBC3    | SNHG7    |  | BRPF1       | BRD7          | ARRDC3   | NCF2        |  |
| EBP    | CARD8   | SNHG1    |  | OSBPL9      | SLC25A28      | LCE2C    | AEBP2       |  |
| TXNIP  | PSMA2   | SNHG16   |  | INTS2       | MFN2          | FAR1     | AGPS        |  |
| ANKH   | MAPK8   | SNHG6    |  | MMD         | SLC11A2       | PHF21A   | CDCA3       |  |
| RHOT2  | UNC5B   | SFTA1P   |  | CYP4F8      | ZFAS1         | SMAD7    | PEX2        |  |
| CYLD   | PSMD3   | CDK1     |  | MLLT1       | TSC1          | LYRM1    | PEX6        |  |
| GSTM1  | SEPTIN4 | NFS1     |  | TTPA        | TGFB1         | AMN      | TIMM9       |  |
| GSR    | KPNB1   | SAMHD1   |  | GRIA3       | SNCA          | PEX3     |             |  |
| BGN    | C1QBP   | STING1   |  | EPT1        | LIG3          | MTCH1    |             |  |
| BCL2L1 | PSMD11  | CRMA     |  | POM121L12   | ACADSB        | PVT1     |             |  |

PANRGs, genes related to pyroptosis, apoptosis, and necroptosis; FRGs, ferroptosis-related genes; CRGs, cuproptosis-related genes; PRGs, PANoptosis-related genes.
